# Supplementary material for: Low-temperature plasma-enhanced atomic layer deposition of tin oxide electron selective layers for highly efficient planar perovskite solar cells
Source: Royal Society of Chemistry journal article supplement (doi:10.1039/c6ta04503k), 2016-01-01
Supplement: c6ta04503k1.pdf [file c6ta04503k1.pdf]

## **Low-Temperature Plasma-Enhanced Atomic Layer Deposition of Tin Oxide Electron Selective Layers for Highly Efficient Planar Perovskite Solar Cells**

Changlei Wang,<sup>a,b,‡</sup> Dewei Zhao,<sup>\*,a,‡</sup> Corey R. Grice,<sup>a</sup> Weiqiang Liao,<sup>a</sup> Yue Yu,<sup>a</sup> Alexander Cimaroli,<sup>a</sup> Niraj Shrestha,<sup>a</sup> Paul J. Roland,<sup>a</sup> Jing Chen,<sup>c</sup> Zhenhua Yu,<sup>b</sup> Pei Liu,<sup>b</sup> Nian Cheng,<sup>b</sup> Randall J. Ellingson,<sup>a</sup> Xingzhong Zhao,<sup>\*,b</sup> and Yanfa Yan<sup>\*,a</sup>

<sup>a</sup>Department of Physics and Astronomy, and Wright Center for Photovoltaics Innovation and Commercialization, The University of Toledo, Toledo, OH 43606, USA.

<sup>b</sup>Key Laboratory of Artificial Micro/Nano Structures of Ministry of Education, School of Physics and Technology, Wuhan University, Wuhan, 430072, China

<sup>c</sup>School of Electronic Science and Engineering, Southeast University, Nanjing, 210096, China

\*Corresponding author.

E-mail addresses: [dewei\\_zhao@hotmail.com](mailto:dewei_zhao@hotmail.com) (D. Zhao), [xzzhao@whu.edu.cn](mailto:xzzhao@whu.edu.cn) (X. Zhao), [Yanfa.Yan@utoledo.edu](mailto:Yanfa.Yan@utoledo.edu) (Y. Yan).

‡These authors contributed equally to this work

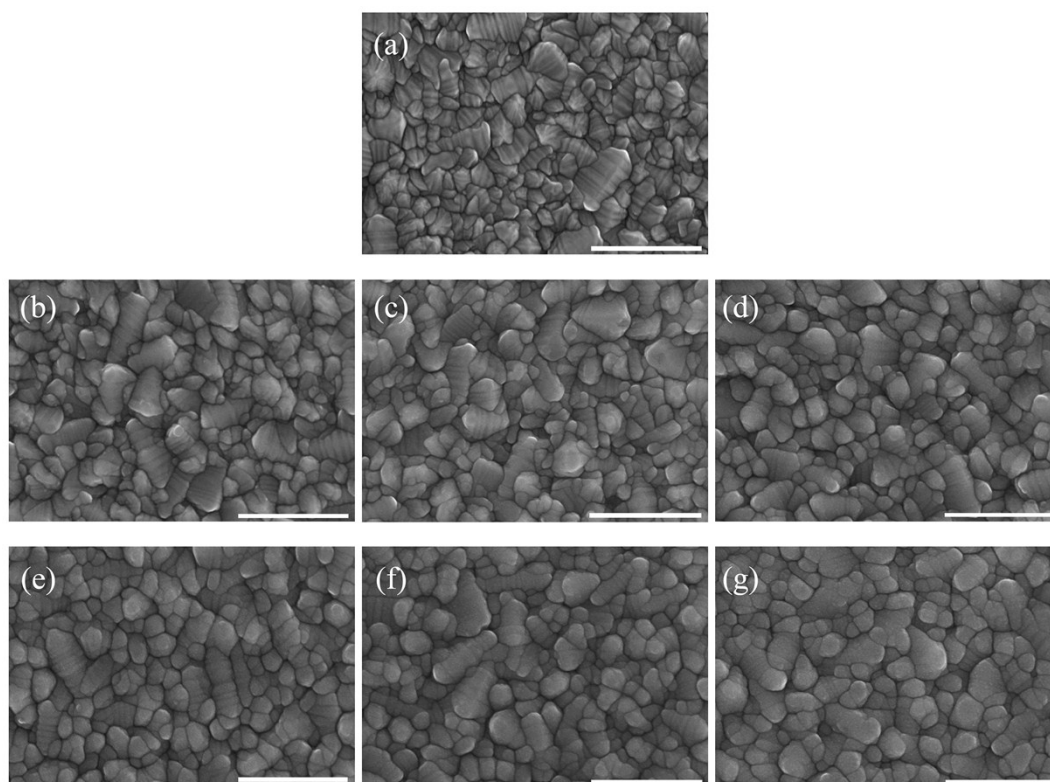

**Fig. S1** SEM images of PEALD grown SnO<sub>2</sub> ESLs with different reaction cycles on FTO coated glass substrates: a-g: 0, 40, 70, 100, 130, 160, and 190 cycles. The processing temperature was 100 °C. The scale bar is 500 nm for all images.

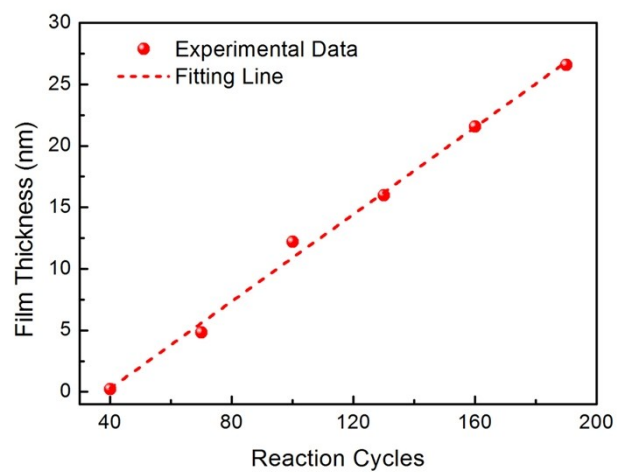

**Fig. S2** Film thickness of SnO<sub>2</sub> ESLs deposited by PEALD at 100 °C with different reaction cycles as determined by spectroscopic ellipsometry.

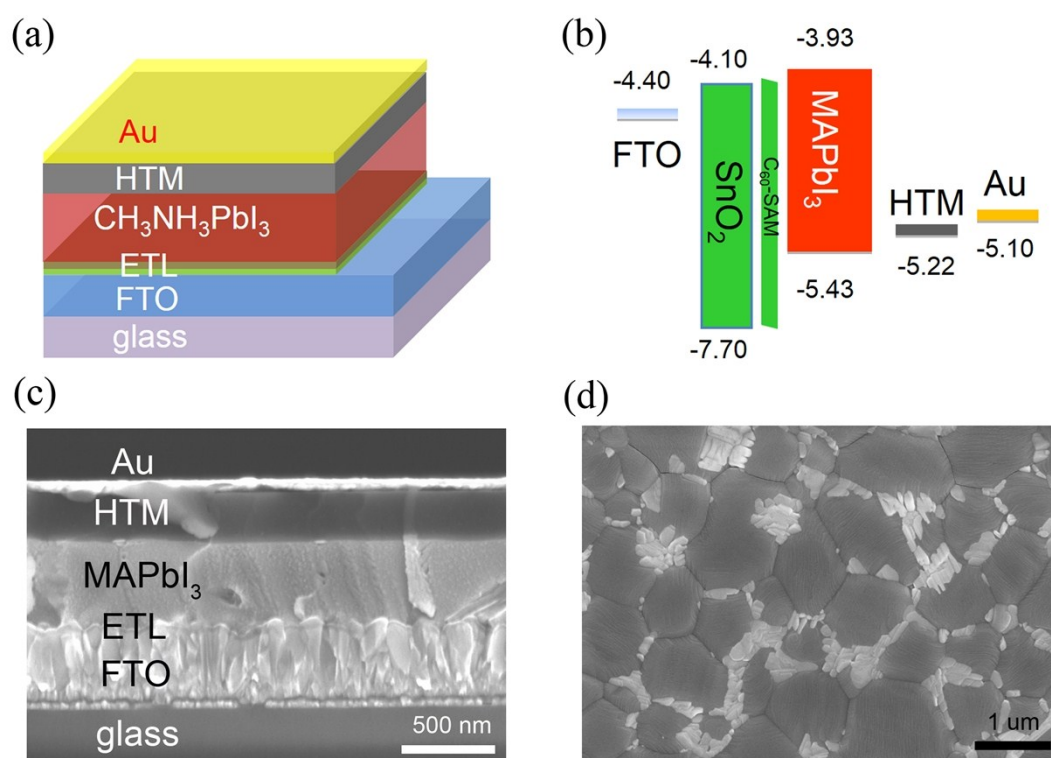

**Fig. S3** (a) Device structure and (b) schematic energy band diagram of our perovskite solar cells (PVSCs). (c) Cross-sectional SEM image of our entire PVSC. (d) Top-view SEM image of perovskite film deposited on  $\text{SnO}_2/\text{C}_{60}$ -SAM coated FTO substrate.

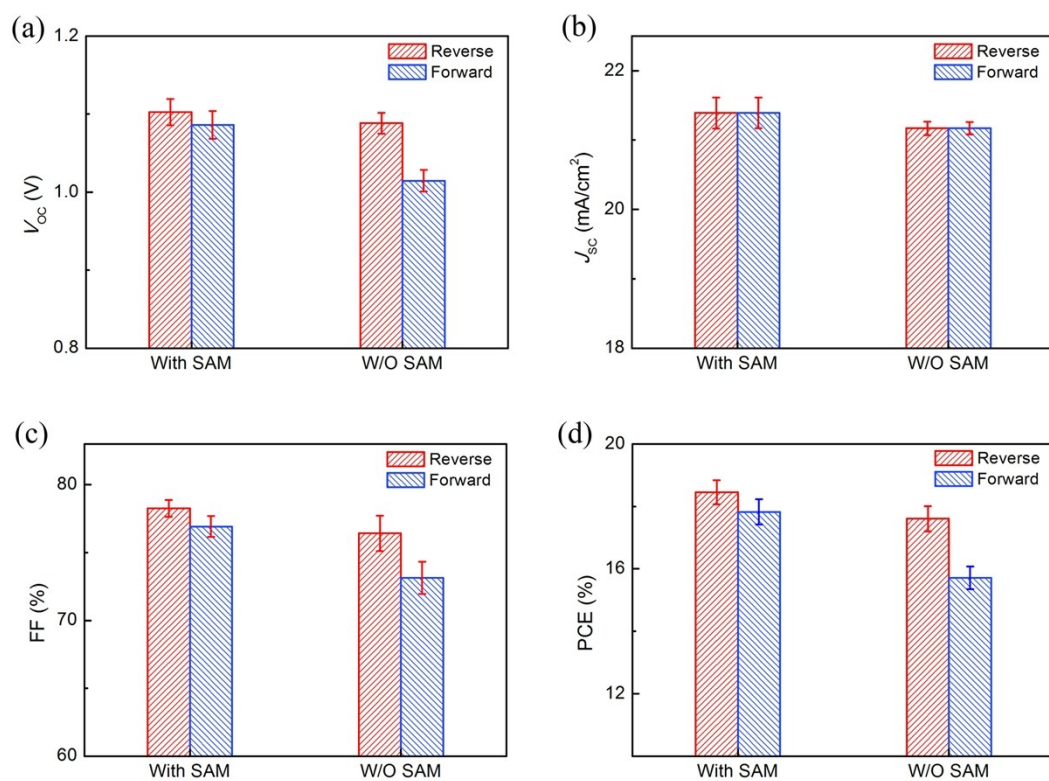

**Fig. S4** Statistical device performance results of 20 cells with and without  $C_{60}$ -SAM interlayers. The  $SnO_2$  ESLs were deposited by PEALD at 100 °C with 130 reaction cycles. Error bars represent the standard deviation calculated from 20 devices prepared at the same conditions.

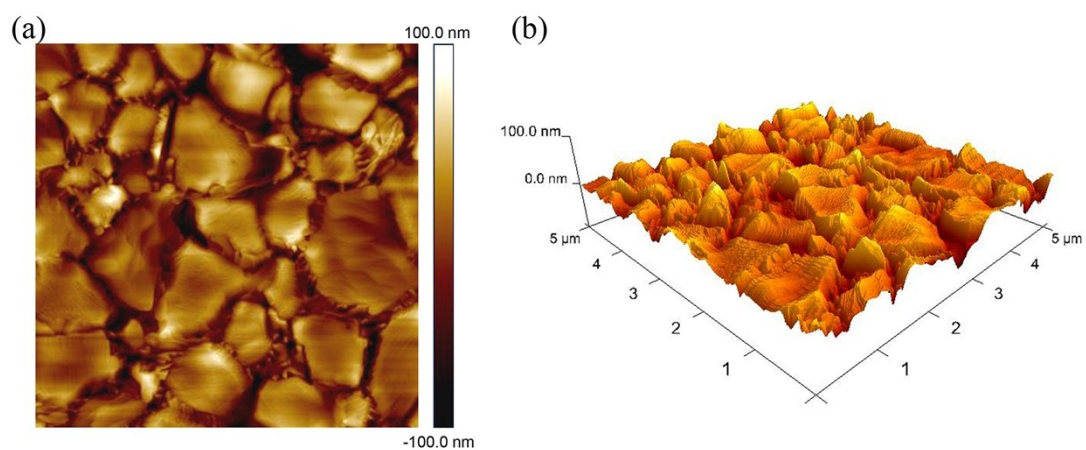

**Fig. S5** AFM images ( $5\mu\text{m}\times 5\mu\text{m}$ ) of perovskite film deposited on  $\text{C}_{60}$ -SAM/ $\text{SnO}_2$ /FTO/Glass substrate. The average surface roughness value was found to be  $R_a = 11.5\text{ nm}$ .

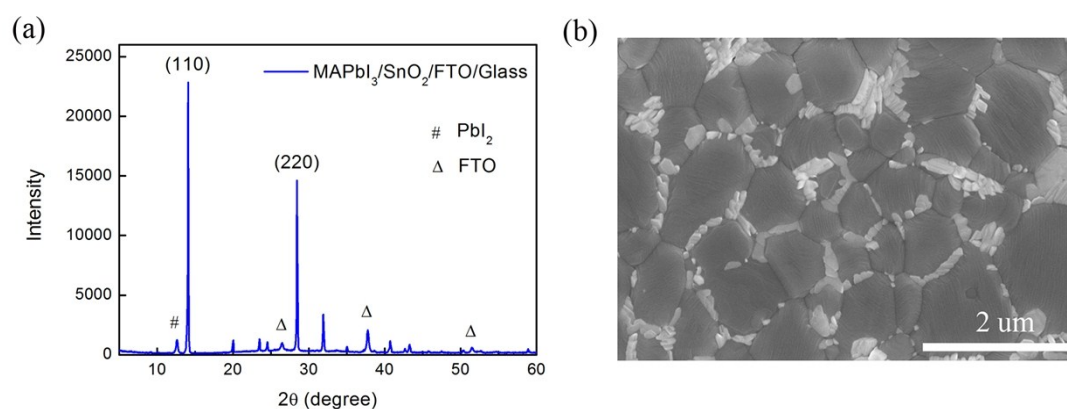

**Fig. S6** XRD pattern (left) and SEM (right) of a perovskite film deposited on  $\text{C}_{60}$ -SAM/ $\text{SnO}_2$ /FTO/Glass substrate. The bright particles at the grain boundaries are  $\text{PbI}_2$  as confirmed in the XRD pattern with a  $\text{PbI}_2$  peak (#) at  $\sim 12.8^\circ$ .

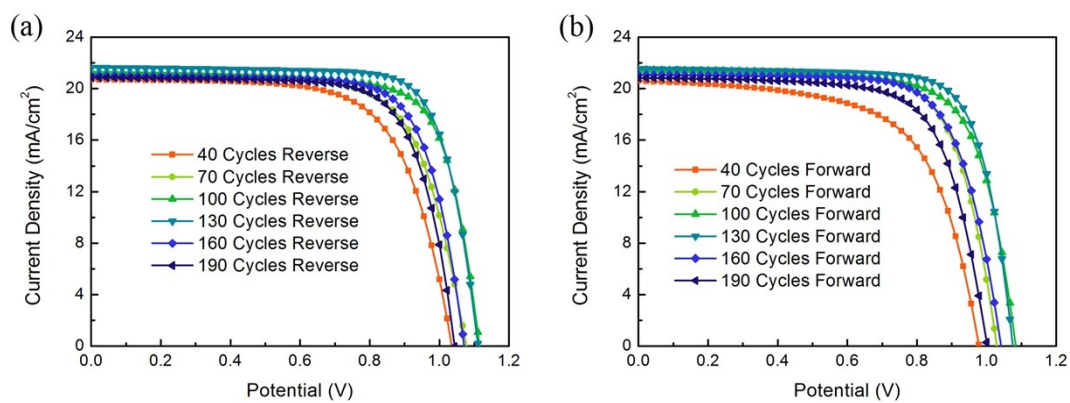

**Fig. S7**  $J$ - $V$  curves of representative perovskite cells using PEALD  $\text{SnO}_2$  ESLs deposited with various reaction cycles measured under reverse and forward voltage scans. The number of reaction cycles for the PEALD  $\text{SnO}_2$  was 130.



**Table S1** Average data for 54 of PVSCs based on PEALD SnO<sub>2</sub> ESL on FTO/glass substrates with various reaction cycles. The processing temperature was 100 °C for all samples. Error values represent the standard deviation (s.d.) calculated from 54 devices prepared at the same conditions.

| Reaction cycles | Scan direction | $V_{OC}$ (V) | $J_{SC}$ (mA/cm <sup>2</sup> ) | FF (%)     | PCE (%)    |
|-----------------|----------------|--------------|--------------------------------|------------|------------|
| 40              | Reverse        | 1.08±0.02    | 19.96±0.35                     | 67.80±1.99 | 14.61±0.90 |
|                 | Forward        | 1.02±0.04    | 19.95±0.38                     | 62.57±2.23 | 12.76±1.04 |
| 70              | Reverse        | 1.09±0.01    | 20.62±0.08                     | 72.77±1.08 | 16.30±0.45 |
|                 | Forward        | 1.05±0.02    | 20.62±0.08                     | 68.74±1.34 | 14.88±0.61 |
| 100             | Reverse        | 1.09±0.01    | 21.30±0.10                     | 75.03±1.05 | 17.43±0.27 |
|                 | Forward        | 1.06±0.01    | 21.31±0.12                     | 70.29±1.28 | 15.83±0.36 |
| 130             | Reverse        | 1.08±0.01    | 21.43±0.08                     | 76.53±1.27 | 17.73±0.25 |
|                 | Forward        | 1.05±0.01    | 21.43±0.07                     | 72.62±2.08 | 16.30±0.66 |
| 160             | Reverse        | 1.07±0.01    | 21.32±0.11                     | 73.63±1.03 | 16.87±0.24 |
|                 | Forward        | 1.04±0.01    | 21.32±0.12                     | 69.37±0.56 | 15.41±0.39 |
| 190             | Reverse        | 1.05±0.01    | 20.97±0.12                     | 72.52±0.53 | 15.96±0.14 |
|                 | Forward        | 1.01±0.03    | 20.97±0.12                     | 67.59±1.38 | 14.28±0.12 |

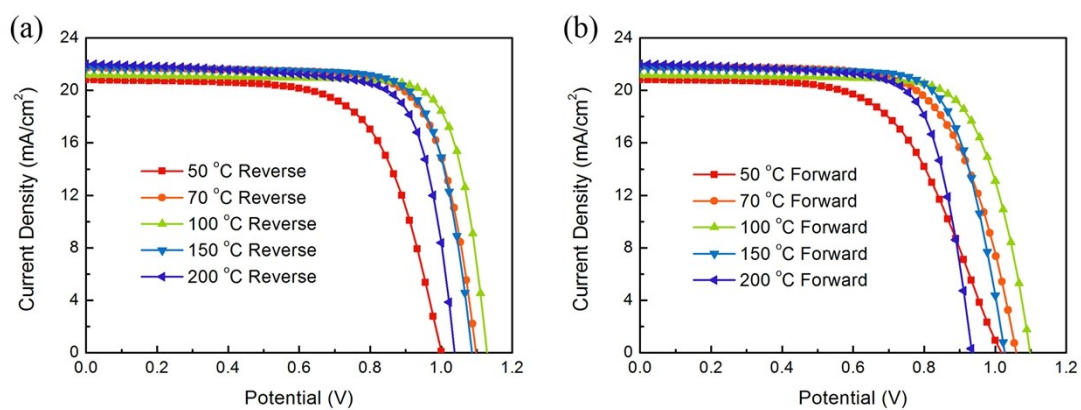

**Fig. S8**  $J$ - $V$  curves of representative perovskite cells using PEALD SnO<sub>2</sub> ESLs deposited at different processing temperatures measured under reverse and forward voltage scans. The number of reaction cycles for the PEALD was 130.

**Table S2** Average photovoltaic performance of 40 PVSCs fabricated on SnO<sub>2</sub> ESL at different deposition temperature. The number of reaction cycles was kept at 130 for all samples. Error values represent the standard deviation calculated from 45 devices prepared at the same conditions.

| Reaction temperature (°C) | Scan direction | $V_{OC}$ (V) | $J_{SC}$ (mA/cm <sup>2</sup> ) | FF (%)     | PCE (%)    |
|---------------------------|----------------|--------------|--------------------------------|------------|------------|
| 50                        | Reverse        | 1.01±0.02    | 20.82±0.13                     | 71.96±1.63 | 15.15±0.31 |
|                           | Forward        | 1.00±0.02    | 20.79±0.14                     | 64.45±2.16 | 13.42±0.54 |
| 70                        | Reverse        | 1.07±0.04    | 21.18±0.29                     | 73.86±1.43 | 16.71±1.10 |
|                           | Forward        | 1.03±0.04    | 21.18±0.29                     | 70.37±1.42 | 15.32±0.63 |
| 100                       | Reverse        | 1.11±0.02    | 21.08±0.42                     | 77.62±1.34 | 18.21±0.59 |
|                           | Forward        | 1.10±0.01    | 21.08±0.42                     | 73.18±1.77 | 16.98±0.49 |
| 150                       | Reverse        | 1.08±0.02    | 21.41±0.33                     | 76.72±0.88 | 17.64±0.53 |
|                           | Forward        | 1.02±0.02    | 21.41±0.33                     | 74.63±0.90 | 16.25±0.54 |
| 200                       | Reverse        | 1.03±0.02    | 21.66±0.27                     | 73.23±1.24 | 16.28±0.55 |
|                           | Forward        | 0.93±0.01    | 21.66±0.27                     | 72.69±1.26 | 14.70±0.45 |

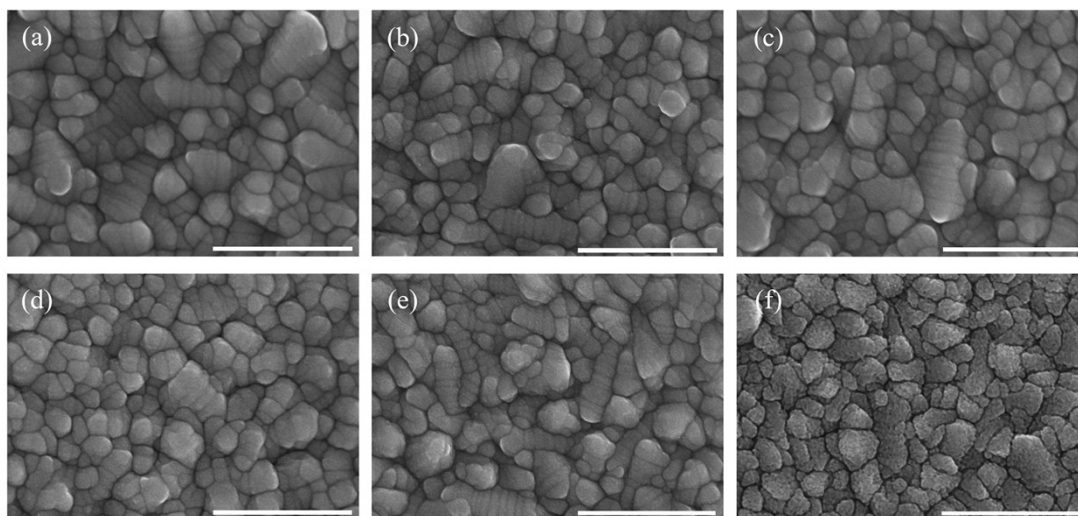

**Fig. S9** The SEM images of PEALD SnO<sub>2</sub> coated FTO/glass substrates with different deposition temperature: (a) 50 °C, (b) 70 °C, (c) 100 °C, (d) 150 °C, (e) 200 °C and (f) 400 °C. The number of PEALD reaction cycles is 130 for all samples. The scale bar is 500 nm for all images. We can see that under higher temperature, SnO<sub>2</sub> will crystallize and resulting in pinholes.

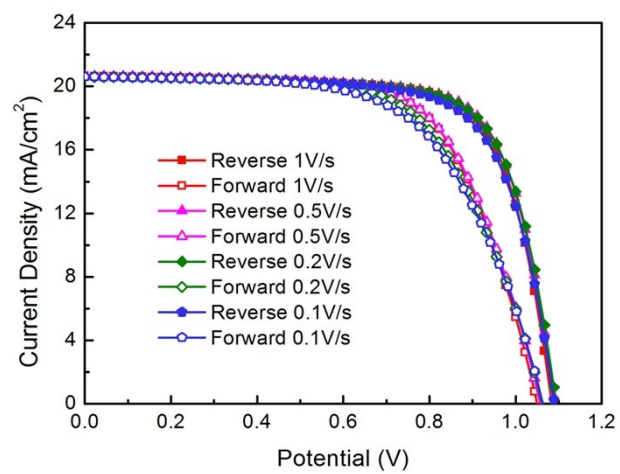

**Fig. S10**  $J$ - $V$  curves of one flexible PVSC measured under reverse and forward voltage scans with various scan rates.

**Table S3**  $J$ - $V$  parameters of the flexible PVSC measured under reverse and forward voltage scans with various scan rates.

| Scan direction | Scan speed (V/s) | $V_{OC}$ (V) | $J_{SC}$ (mA/cm <sup>2</sup> ) | FF (%) | PCE (%) |
|----------------|------------------|--------------|--------------------------------|--------|---------|
| Reverse        | 1                | 1.09         | 20.65                          | 73.32  | 16.50   |
| Forward        | 1                | 1.05         | 20.63                          | 66.57  | 14.42   |
| Reverse        | 0.5              | 1.09         | 20.63                          | 73.64  | 16.56   |
| Forward        | 0.5              | 1.06         | 20.62                          | 66.13  | 14.45   |
| Reverse        | 0.2              | 1.09         | 20.63                          | 73.12  | 16.44   |
| Forward        | 0.2              | 1.06         | 20.61                          | 63.52  | 13.88   |
| Reverse        | 0.1              | 1.09         | 20.62                          | 71.23  | 16.01   |
| Forward        | 0.1              | 1.06         | 20.61                          | 62.27  | 13.60   |

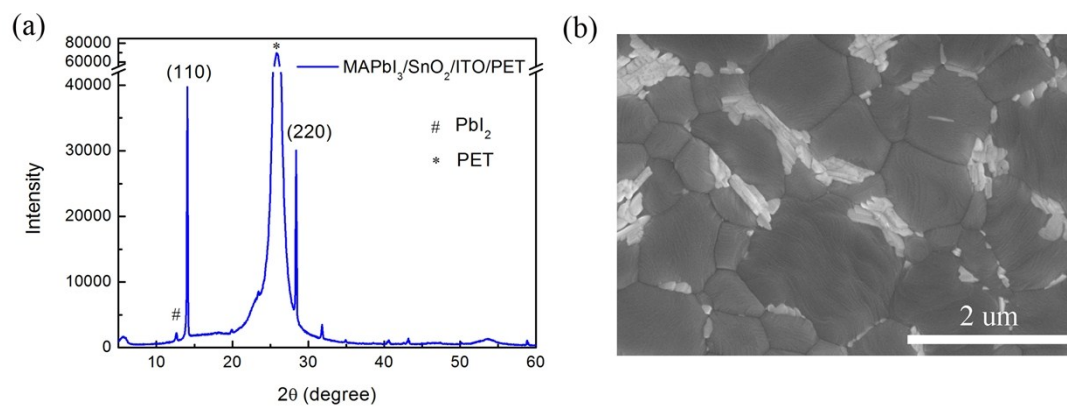

**Fig. S11** (a) XRD pattern and (b) SEM of a perovskite film deposited on C<sub>60</sub>-SAM/SnO<sub>2</sub>/ITO/PET substrate. The relatively bright particles are PbI<sub>2</sub>.

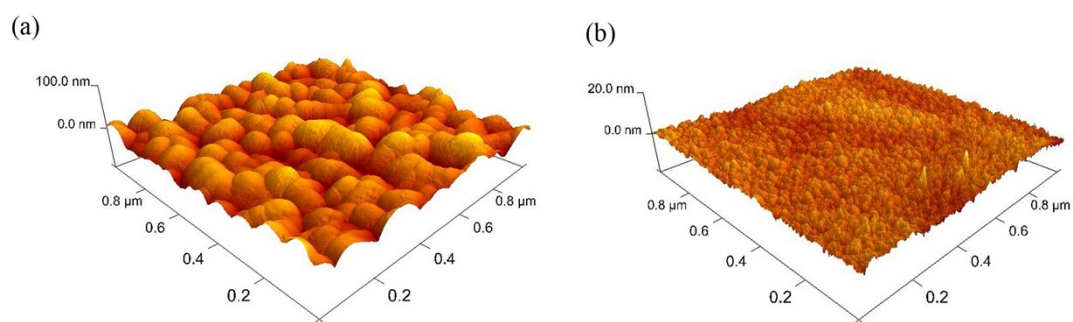

**Fig. S12** AFM images ( $1\mu\text{m}\times 1\mu\text{m}$ ) of (a) FTO-coated glass substrate and (b) ITO-coated PET substrate.



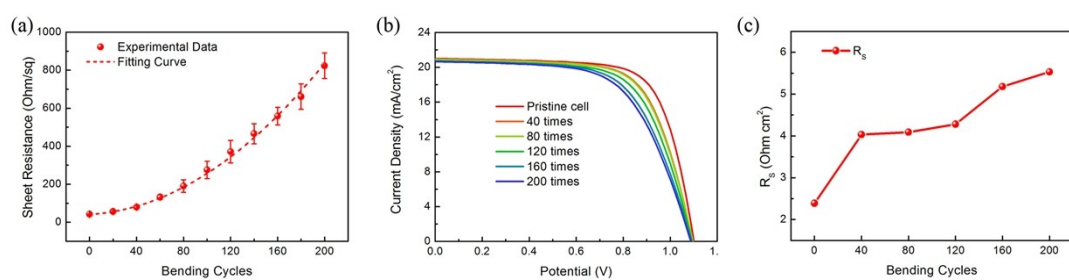

**Fig. S13** (a) Sheet resistance of ITO/PET flexible substrate versus bending cycles. (b)  $J$ - $V$  curves of a flexible PVSC measured under reverse voltage scans after various bending cycles. (c) The measured series resistance of the flexible PVSC after bending cycles.

**Table S4** Average photovoltaic performance of 30 flexible PVSCs fabricated on SnO<sub>2</sub> ESL coated ITO/PET substrate with different scan directions. The deposition temperature of SnO<sub>2</sub> ESL is 100 °C with 130 reaction cycles. Error values represent the standard deviation calculated from 30 devices prepared at the same conditions.

| Scan<br>direction | $V_{oc}$<br>(V) | $J_{sc}$<br>(mA/cm <sup>2</sup> ) | FF<br>(%)  | PCE<br>(%) |
|-------------------|-----------------|-----------------------------------|------------|------------|
| Reverse           | 1.07±0.04       | 20.68±0.22                        | 70.33±3.18 | 15.57±1.14 |
| Forward           | 1.03±0.05       | 20.73±0.28                        | 61.70±3.42 | 13.18±1.00 |
